# Supplementary material for: Inhibitory Mechanism of Trichoderma virens ZT05 on Rhizoctonia solani
Source: PubMed Central journal article supplement (PMC7412022; doi:10.3390/plants9070912), 2020-07-19
Supplement: plants-09-00912-s001.pdf [file plants-09-00912-s001.pdf]

Supplementary Table S1

| Gene name                          | Log2FC<br>(Rs_Tv/Tv) | Padjust     | Length | Swiss-prot-hit-name    | Swiss-prot description                                 |
|------------------------------------|----------------------|-------------|--------|------------------------|--------------------------------------------------------|
| <b>Extracellular Proteases</b>     |                      |             |        |                        |                                                        |
| TRIVIDRAFT_81735                   | 1.871359288          | 1.36495E-13 | 3326   | sp Q7SA85 LONP2_NEUCR; | Lon protease homolog 2, peroxisomal                    |
| TRIVIDRAFT_63956                   | 2.422062731          | 1.14807E-12 | 1569   | sp E3QWD3 NPIIA_COLGM; | Neutral protease 2 homolog MGG_10927                   |
| <b>Oligopeptide transporters</b>   |                      |             |        |                        |                                                        |
| TRIVIDRAFT_58191                   | 1.631203             | 8.44E-09    | 2740   | sp O82485 OPT7_ARATH;  | Oligopeptide transporter 7                             |
| <b>G-protein coupled receptors</b> |                      |             |        |                        |                                                        |
| TRIVIDRAFT_35938                   | 1.212964             | 4.02E-10    | 20134  | sp Q99144 PEX5_YARLI;  | Peroxisomal targeting signal receptor                  |
| TRIVIDRAFT_30459                   | 1.033583             | 0.000915    | 1064   | sp Q09749 ADRL_SCHPO;  | ADIPOR-like receptor SPBC12C2.09c                      |
| TRIVIDRAFT_59177                   | 1.166872             | 0.014158    | 3775   | sp Q8BTN6 LENG9_MOUSE; | Leukocyte receptor cluster member 9                    |
| TRIVIDRAFT_138511                  | 1.39178              | 0.040013    | 576    | sp P57078 RIPK4_HUMAN; | Receptor-interacting serine/threonine-protein kinase 4 |

Supplementary Table S2

| Gene name                   | Log2FC<br>(Rs_Tv/Tv) | Padjust     | Length | Swiss-prot-hit-name       | Swiss-prot description                                 |
|-----------------------------|----------------------|-------------|--------|---------------------------|--------------------------------------------------------|
| <b>Chitinase</b>            |                      |             |        |                           |                                                        |
| TRIVIDRAFT_178019           | 2.615454             | 4.65E-13    | 1335   | sp Q12713 CHI33_TRIHA;    | Endochitinase 33                                       |
| TRIVIDRAFT_89999            | 1.658827             | 5.41E-10    | 1371   | sp Q8Njq5 CHI37_TRIHA;    | Endochitinase 37                                       |
| ECH1                        | 1.39482              | 2.4E-06     | 1632   | sp A6N6J0 CHI46_TRIHA;    | Endochitinase 46                                       |
| TRIVIDRAFT_69839            | 1.110896             | 0.000115    | 3198   | sp P32470 CHI1_APHAL;     | Chitinase 1                                            |
| TRIVIDRAFT_213202           | 2.339033             | 0.000256    | 1596   | sp E9ENC6 CHI3_METRA;     | Endochitinase 3                                        |
| CHT1.1                      | 1.453396             | 0.000675    | 1469   | sp Q12713 CHI33_TRIHA;    | Endochitinase 33                                       |
| <b>Glucanase</b>            |                      |             |        |                           |                                                        |
| TRIVIDRAFT_89797            | 1.615731             | 1.63E-08    | 1893   | sp A0A024SH20 GUN2_HYPJR; | Endoglucanase EG-II                                    |
| TRIVIDRAFT_72072            | 2.02365              | 1.7E-07     | 1565   | sp P23548 GUN_PAEPO;      | Endoglucanase                                          |
| TRIVIDRAFT_27891            | 1.873419             | 2.41284E-06 | 1179   | sp Q0CEU4 EGLD_ASPTN;     | Probable endo-beta-1,4-glucanase D                     |
| TRIVIDRAFT_42536            | 1.805727             | 0.006974728 | 834    | sp P22669 GUN_ASPAC;      | Endoglucanase-1                                        |
| TRIVIDRAFT_28149            | 1.834324             | 0.00858733  | 849    | sp A1D4F1 XGEA_NEOFI;     | Probable xyloglucan-specific endo-beta-1,4-glucanase A |
| TRIVIDRAFT_76895            | 1.171856             | 0.011841965 | 1655   | sp Q7M4T0 NEG1_NEUCR;     | Endo-1,6-beta-D-glucanase                              |
| <b>Protease(proteasome)</b> |                      |             |        |                           |                                                        |
| TRIVIDRAFT_176639           | 1.08760              | 0.0013236   | 1450   | sp E9ES90 STS1_METRA;     | Tethering factor for nuclear proteasome STS1           |

Supplementary Table S3

| Gene name                               | Log2FC<br>(Rs_Tv/Tv) | Padjust  | Length | Swiss-prot-hit-name        | Swiss-prot description                                        |
|-----------------------------------------|----------------------|----------|--------|----------------------------|---------------------------------------------------------------|
| <b>Tetracycline resistance proteins</b> |                      |          |        |                            |                                                               |
| TRIVIDRAFT_57595                        | 1.326570             | 0.000512 | 3735   | sp Q01911 TETX_BACFG;      | Tetracycline resistance protein from transposon Tn4351/Tn4400 |
| TRIVIDRAFT_219995                       | 1.458342             | 0.010485 | 1140   | sp E9R876 GLIA_ASPFU;      | MFS gliotoxin efflux transporter gliA                         |
| <b>Reductase</b>                        |                      |          |        |                            |                                                               |
| TRIVIDRAFT_62654                        | 1.294983             | 0.046806 | 1084   | sp P39315 QOR2_ECOLI;      | Quinone oxidoreductase 2                                      |
| TRIVIDRAFT_211837                       | 1.793853             | 3.275094 | 1619   | sp A7RK30 QORL2_NEMVE;     | Quinone oxidoreductase-like protein 2 homolog                 |
| TRIVIDRAFT_38645                        | 2.264700             | 0.005178 | 789    | sp A0A084R1K2 ATR9_STAC4;  | Short-chain dehydrogenase/reductase ATR9                      |
| TRIVIDRAFT_42391                        | 1.415816             | 0.000231 | 972    | sp Q53FA7 QORX_HUMAN;      | Quinone oxidoreductase PIG3                                   |
| TRIVIDRAFT_45041                        | 1.021142             | 0.000158 | 762    | sp A0A084R1I4 ATR10_STAC4; | Short-chain dehydrogenase/reductase ATR10                     |
| TRIVIDRAFT_50977                        | 2.939743             | 1.383962 | 3653   | sp Q9Y8G7 C505_FUSOX;      | Bifunctional cytochrome P450/NADPH--P450 reductase            |
| TRIVIDRAFT_68923                        | 2.929785             | 7.664841 | 5558   | sp Q9Y8G7 C505_FUSOX;      | Bifunctional cytochrome P450/NADPH--P450 reductase            |
| TRIVIDRAFT_69465                        | 2.091020             | 4.233595 | 1211   | sp Q53FA7 QORX_HUMAN;      | Quinone oxidoreductase PIG3                                   |
| TRIVIDRAFT_71556                        | 1.026713             | 0.000117 | 2783   | sp A2QS05 NCPR_ASPNC;      | NADPH--cytochrome P450 reductase                              |
| <b>The heat shock response</b>          |                      |          |        |                            |                                                               |
| TRIVIDRAFT_216898                       | 1.548984             | 0.000001 | 3182   | sp P31540 HSP98_NEUCR;     | Heat shock protein hsp98                                      |
| TRIVIDRAFT_80583                        | 2.087637             | 0.000001 | 2645   | sp O74402 HSP78_SCHPO;     | Heat shock protein 78, mitochondrial                          |
| TRIVIDRAFT_215292                       | 2.040524             | 0.000008 | 1032   | sp P19752 HSP30_NEUCR;     | 30 kDa heat shock protein                                     |
| TRIVIDRAFT_210885                       | 1.331958             | 0.000009 | 2378   | sp Q01233 HSP70_NEUCR;     | Heat shock 70 kDa protein                                     |
| TRIVIDRAFT_89650                        | 1.180429             | 0.000049 | 2885   | sp O43109 HSP90_PODAS;     | Heat shock protein 90 homolog                                 |
| TRIVIDRAFT_195722                       | 1.697725             | 0.000104 | 3374   | sp Q9CZJ2 HS12B_MOUSE;     | Heat shock 70 kDa protein 12B                                 |
| TRIVIDRAFT_78895                        | 1.313931             | 0.000416 | 2608   | sp Q5B0C0 HSP7M_EMENI;     | Heat shock 70 kDa protein                                     |
| TRIVIDRAFT_217094                       | 1.707831             | 0.000769 | 1016   | sp P19752 HSP30_NEUCR;     | 30 kDa heat shock protein                                     |
| <b>The oxidative stress response</b>    |                      |          |        |                            |                                                               |
| TRIVIDRAFT_207997                       | 3.32                 | 0.000004 | 1385   | sp Q9SIE0 ALKB2_ARAT       | DNA oxidative demethylase                                     |

|                                          |          |          |      | H;                         | ALKBH2                                                               |
|------------------------------------------|----------|----------|------|----------------------------|----------------------------------------------------------------------|
| <b>ABC efflux transporters</b>           |          |          |      |                            |                                                                      |
| TRIVIDRAFT_33722                         | 3.058718 | 1.000032 | 6901 | sp Q54U44 ABCCC_DICD<br>I; | ABC transporter C family member 12                                   |
| TRIVIDRAFT_52608                         | 2.828204 | 6.685599 | 5033 | sp P53756 PDR18_YEAST;     | ABC transporter ATP-binding protein/permease PDR18                   |
| TRIVIDRAFT_86623                         | 1.904562 | 3.892920 | 5338 | sp I1RL06 ZRA1_GIBZE;      | ZEB2-regulated ABC transporter 1                                     |
| TRIVIDRAFT_36031                         | 2.62432  | 3.623095 | 5676 | sp Q8J2Q1 FUM19_GIBM<br>7; | ABC transporter FUM19                                                |
| TRIVIDRAFT_85589                         | 2.208254 | 6.399924 | 4840 | sp I1RL06 ZRA1_GIBZE;      | ZEB2-regulated ABC transporter 1                                     |
| TRIVIDRAFT_190418                        | 1.268807 | 0.000066 | 4858 | sp K0E4D9 ECDL_ASPRU<br>;  | ABC transporter ecdL                                                 |
| TRIVIDRAFT_45576                         | 1.104975 | 0.000530 | 4180 | sp Q08234 YO075_YEAST;     | Uncharacterized ABC transporter ATP-binding protein/permease YOL075C |
| TRIVIDRAFT_83793                         | 1.480492 | 0.003585 | 5036 | sp I1RL06 ZRA1_GIBZE;      | ZEB2-regulated ABC transporter 1                                     |
| <b>Multidrug resistance transporters</b> |          |          |      |                            |                                                                      |
| TRIVIDRAFT_76205                         | 3.472369 | 1.114803 | 2237 | sp Q6FV98 TPO12_CANG<br>A; | Multidrug transporter TPO1_2                                         |
| TRIVIDRAFT_192676                        | 3.777513 | 1.390707 | 2219 | sp Q6FV98 TPO12_CANG<br>A; | Multidrug transporter TPO1_2                                         |
